# Supplementary material
Source: publisher figshare collection journal article supplement (https://tandf.figshare.com/ndownloader/files/13594853)
Supplement: Supplementary file 1 [file 13594853]

Supplementary Table S1. Description of linked or matched ICF d-codes of the FUNDES-Child

| FUNDES linked code | Description | Name of d code block |
| --- | --- | --- |
|
| d140 | Learning to read | Learning and using knowledge |
| d145 | Learning to write |
| d150 | Learning to calculate |
| d155 | Acquiring skills |
| d166 | Reading |
| d835 | School life and related activities |
| **d230a** | **Carrying out daily routine** |  |
| d310 | Communicating receiving spoken messages | Basic communication |
| d315 | Communicating - receiving nonverbal messages |
| d320 | Communicating - receiving sign language |
| d330 | Speaking |
| d331 | Pre-talking |
| d335 | Producing nonverbal messages |
| d340 | Producing messages in formal sign language |
| d345 | Writing messages |
| **d350 a** | **Conversation** |
| d360 | Using communication device & technique |  |
| **d450a, b** | **Walking** |  |
| **d460 a, b** | **Moving around in different locations** | Moving around |
| d465 | Moving around using equipment |
| d470 | Using transportation | Transportation using |
| d475 | Driving |
| d510 | Washing oneself | Basic self-care |
| d520 | Caring for body parts |
| **d530 a, b** | **Toileting** |
| d540 | Dressing |
| **d550 a, b** | **Eating** |
| d560 | Drinking |
| d620 | Acquisition of goods and services |  |
| d630 | Preparing meals |  |
| d640 | Doing housework |  |
| d650 | Caring for household objects | Caring |
| d660 | Assisting others |
| **d710 a, b** | **Basic interpersonal interactions** | Social play |
| **d720 b** | **Complex interpersonal interactions** |
| d880 | Engagement in play |
| **d920 a, b** | **Recreation and leisure** |
| d740 | Formal relationships |  |
| d750 | Informal social relationships |  |
| **d760 a, b** | **Family relationships** |  |
| **d820 a, b** | **School education** |  |
| d860 | Basic economic transactions |  |
| d910 | Community life |  |
| d930 | Religion and spirituality |  |

a: matched code of Child CP Set, b: matched code of Youth CP Set.
